# Supplementary material for: Detection and role of trace impurities in high-performance organic solar cells
Source: Royal Society of Chemistry journal article supplement (doi:10.1039/c3ee40556g), 2013-01-01
Supplement: c3ee40556g.pdf [file c3ee40556g.pdf]

## Supplementary Information for

### Detection and role of trace impurities in high-performance organic solar cells

Maxim P. Nikiforov<sup>1</sup>, Barry Lai<sup>2</sup>, Wei Chen<sup>3,4</sup>, Si Chen<sup>2</sup>, Richard D. Schaller<sup>1,5</sup>, Joseph Strzalka<sup>2</sup>, Jörg Maser<sup>2</sup> and Seth B. Darling<sup>1,4\*</sup>

<sup>1</sup> Center for Nanoscale Materials, Argonne National Laboratory, Argonne, IL 60439, USA.

<sup>2</sup> X-ray Science Division, Argonne National Laboratory, Argonne, IL 60439, USA.

<sup>3</sup> Materials Science Division, Argonne National Laboratory, Argonne, IL 60439, USA.

<sup>4</sup> Institute for Molecular Engineering, The University of Chicago, Chicago, IL 60637, USA.

<sup>5</sup> Department of Chemistry, Northwestern University, Evanston, IL 60201, USA.

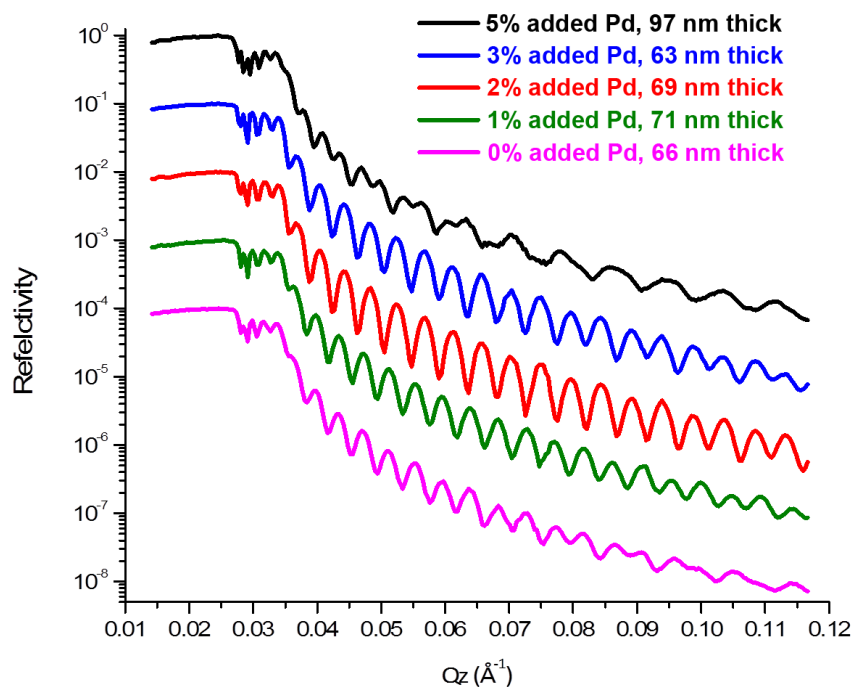

**Figure S1.** X-ray reflectivity (XRR) data from PTB7/PC<sub>71</sub>BM blend films used in XRF measurements having various amounts of added Pd(PPh<sub>3</sub>)<sub>4</sub> catalyst.

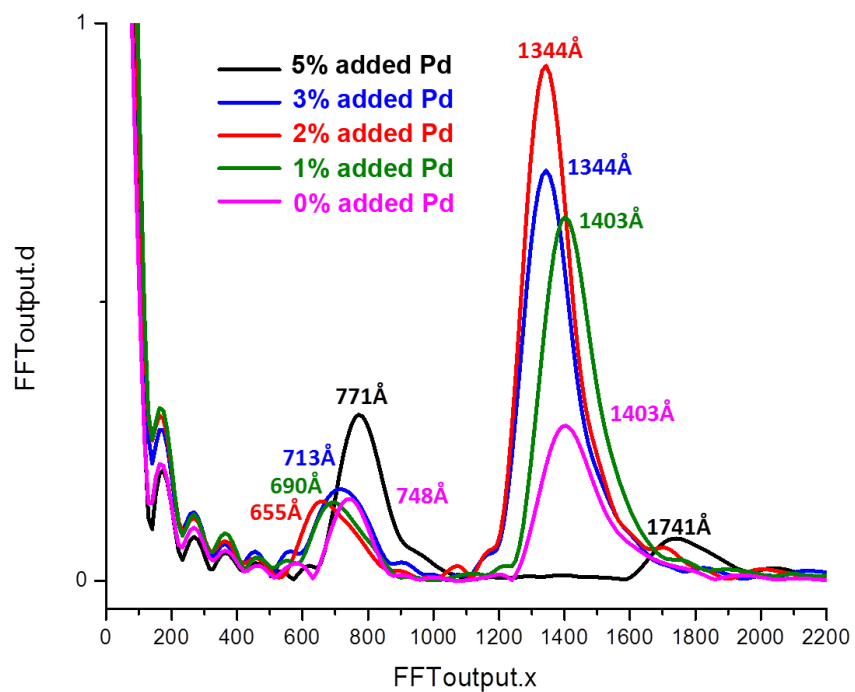

**Figure S2.** Fourier analysis of XRR data from PTB7/PC<sub>71</sub>BM blend films used in XRF measurements having various amounts of added Pd(PPh<sub>3</sub>)<sub>4</sub> catalyst. These FFT signatures were used to measure the film thickness.
